# Supplementary material for: Hydrothermal synthesis, structures, and luminescent properties of four new zinc(ii) diphosphonate hybrids with mixed ligands
Source: Royal Society of Chemistry journal article supplement (doi:10.1039/c1ce05291h), 2011-01-01
Supplement: c1ce05291h.pdf [file c1ce05291h.pdf]

# Hydrothermal synthesis, structures, and luminescent properties of four new zinc(II) diphosphonate hybrids with mixed ligands

Wei-Nan Wang, Zhen-Gang Sun,\* Yan-Yu Zhu, Da-Peng Dong, Jing Li, Fei Tong, Cui-Ying Huang, Kai Chen, Chao Li, Cheng-Qi Jiao and Cheng-Lin Wang

Institute of Chemistry for Functionalized Materials, School of Chemistry and Chemical Engineering, Liaoning Normal University, Dalian 116029, P. R. China.

E-mail: szg188@163.com (Z. -G. Sun)

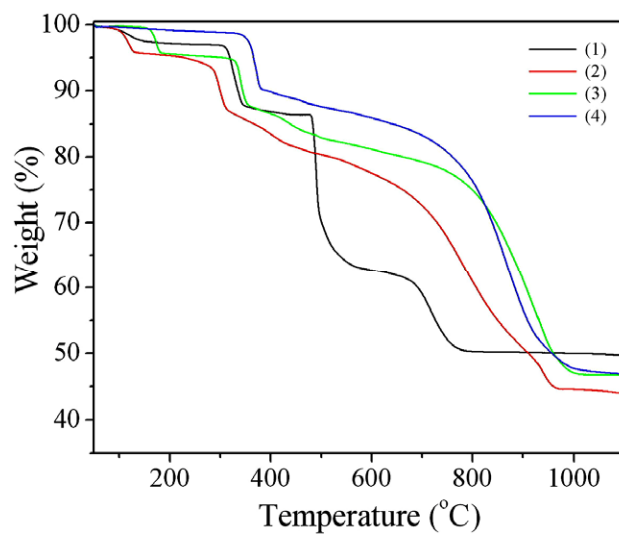

Fig. S1 The TGA curves of compounds 1– 4

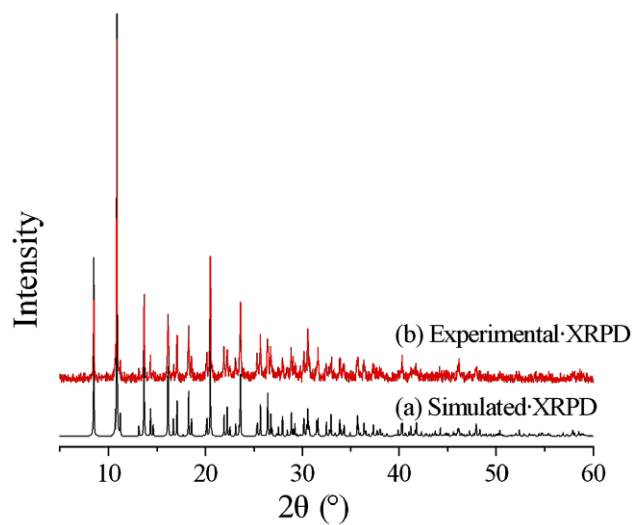

**Fig. S2** The simulated and experimental XRD powder patterns for compound 1 (a) and (b)

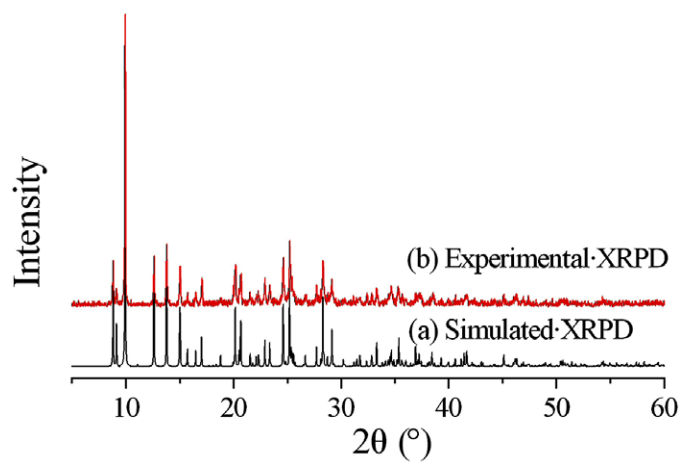

**Fig. S3** The simulated and experimental XRD powder patterns for compound 2 (a) and (b)

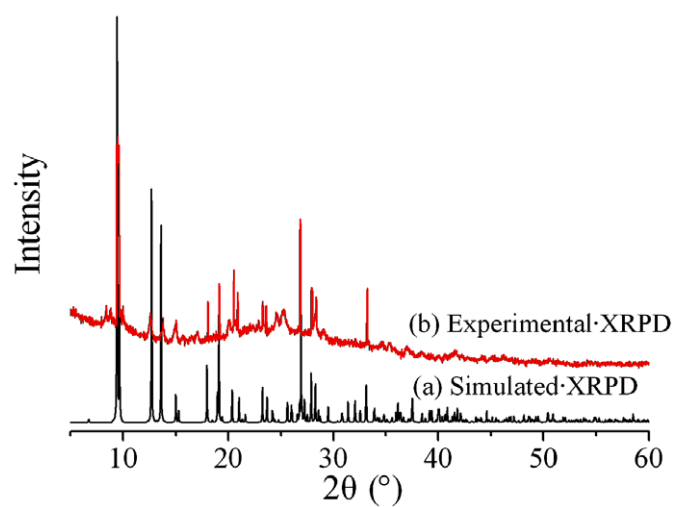

**Fig. S4** The simulated and experimental XRD powder patterns for compound **3** (a) and (b)

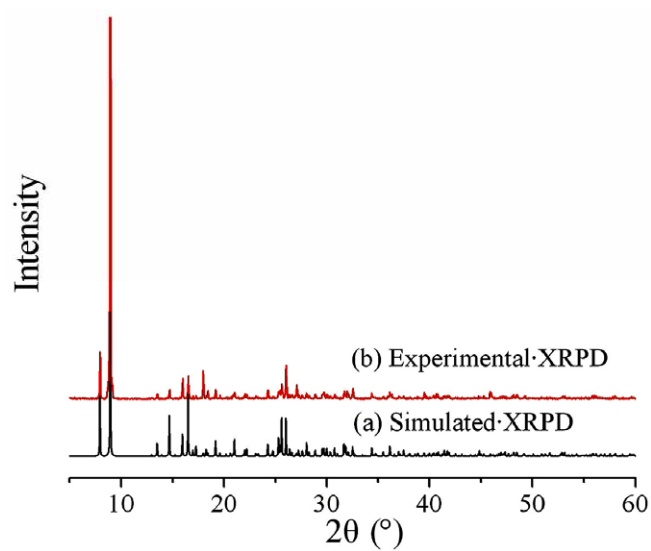

**Fig. S5** The simulated and experimental XRD powder patterns for compound **4** (a) and (b)

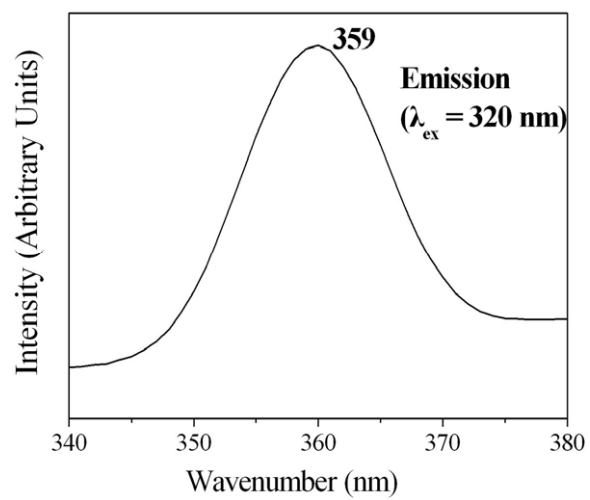

**Fig. S6** The room-temperature luminescent emission spectrum of hedpH<sub>4</sub> solution.

**Table S1** Selected bond lengths (Å) and angles (°) for compounds **1–4**

| Compound 1        |            |                   |            |
|-------------------|------------|-------------------|------------|
| Zn(1)–O(4)        | 1.958(2)   | Zn(1)–O(2)A       | 1.972(2)   |
| Zn(1)–N(2)        | 2.086(3)   | Zn(1)–O(1)        | 2.114(2)   |
| Zn(1)–N(1)        | 2.146(3)   | P(1)–O(2)         | 1.502(2)   |
| P(1)–O(1)         | 1.516(2)   | P(1)–O(3)         | 1.557(2)   |
| P(1)–C(1)         | 1.829(4)   | P(2)–O(5)         | 1.491(3)   |
| P(2)–O(4)         | 1.497(3)   | P(2)–O(6)         | 1.575(3)   |
| P(2)–C(1)         | 1.844(4)   | O(2)–Zn(1)A       | 1.972(2)   |
| O(4)–Zn(1)–O(2)A  | 108.75(11) | O(4)–Zn(1)–N(2)   | 127.53(12) |
| O(2)A–Zn(1)–N(2)  | 122.10(11) | O(4)–Zn(1)–O(1)   | 98.93(9)   |
| O(2)A–Zn(1)–O(1)  | 90.65(9)   | N(2)–Zn(1)–O(1)   | 92.92(10)  |
| O(4)–Zn(1)–N(1)   | 89.51(11)  | O(2)A–Zn(1)–N(1)  | 92.43(11)  |
| N(2)–Zn(1)–N(1)   | 77.01(12)  | O(1)–Zn(1)–N(1)   | 169.57(10) |
| Compound 2        |            |                   |            |
| Zn(1)–O(2)A       | 1.986(2)   | Zn(1)–O(4)        | 1.988(2)   |
| Zn(1)–O(1)        | 2.068(2)   | Zn(1)–N(1)        | 2.118(3)   |
| Zn(1)–N(2)        | 2.145(3)   | P(1)–O(2)         | 1.502(2)   |
| P(1)–O(1)         | 1.515(2)   | P(1)–O(3)         | 1.568(2)   |
| P(1)–C(1)         | 1.843(3)   | P(2)–O(6)         | 1.487(3)   |
| P(2)–O(4)         | 1.525(2)   | P(2)–O(5)         | 1.576(2)   |
| P(2)–C(1)         | 1.838(3)   | O(2)–Zn(1)A       | 1.986(2)   |
| O(2)A–Zn(1)–O(4)  | 102.83(10) | O(2)A–Zn(1)–O(1)  | 95.76(9)   |
| O(4)–Zn(1)–O(1)   | 95.28(9)   | O(2)A–Zn(1)–N(1)  | 136.09(11) |
| O(4)–Zn(1)–N(1)   | 120.16(10) | O(1)–Zn(1)–N(1)   | 89.20(10)  |
| O(2)A–Zn(1)–N(2)  | 87.21(10)  | O(4)–Zn(1)–N(2)   | 99.80(10)  |
| O(1)–Zn(1)–N(2)   | 163.59(10) | N(1)–Zn(1)–N(2)   | 77.67(11)  |
| Compound 3        |            |                   |            |
| Zn(1)–O(3)A       | 2.0946(18) | Zn(1)–O(3)        | 2.0946(18) |
| Zn(1)–N(1)        | 2.121(2)   | Zn(1)–N(1)A       | 2.121(2)   |
| Zn(1)–O(4)A       | 2.1451(17) | Zn(1)–O(4)        | 2.1451(17) |
| Zn(2)–O(1)        | 1.9305(18) | Zn(2)–O(1)B       | 1.9305(18) |
| Zn(2)–O(5)B       | 1.9391(18) | Zn(2)–O(5)        | 1.9391(18) |
| P(1)–O(3)         | 1.5016(18) | P(1)–O(1)         | 1.5053(18) |
| P(1)–O(2)         | 1.5683(19) | P(1)–C(1)         | 1.839(3)   |
| P(2)–O(5)         | 1.5071(18) | P(2)–O(4)         | 1.5122(17) |
| P(2)–O(6)         | 1.5572(19) | P(2)–C(1)         | 1.838(3)   |
| O(3)A–Zn(1)–O(3)  | 84.49(10)  | O(3)A–Zn(1)–N(1)  | 177.31(8)  |
| O(3)A–Zn(1)–N(1)  | 177.31(8)  | O(3)–Zn(1)–N(1)   | 98.17(8)   |
| O(3)A–Zn(1)–N(1)A | 98.17(8)   | O(3)–Zn(1)–N(1)A  | 177.31(8)  |
| N(1)–Zn(1)–N(1)A  | 79.17(13)  | O(3)A–Zn(1)–O(4)A | 93.14(7)   |
| O(3)–Zn(1)–O(4)A  | 84.72(7)   | N(1)–Zn(1)–O(4)A  | 86.73(8)   |
| N(1)A–Zn(1)–O(4)A | 95.50(8)   | O(3)A–Zn(1)–O(4)  | 84.72(7)   |
| O(3)–Zn(1)–O(4)   | 93.14(7)   | N(1)–Zn(1)–O(4)   | 95.50(8)   |

|                   |            |                  |            |
|-------------------|------------|------------------|------------|
| N(1)A–Zn(1)–O(4)  | 86.73(8)   | O(4)A–Zn(1)–O(4) | 177.12(9)  |
| O(1)–Zn(2)–O(1)B  | 114.69(12) | O(1)–Zn(2)–O(5)B | 112.69(8)  |
| O(1)B–Zn(2)–O(5)B | 102.22(8)  | O(1)–Zn(2)–O(5)  | 102.22(8)  |
| O(1)B–Zn(2)–O(5)  | 112.69(8)  | O(5)B–Zn(2)–O(5) | 112.77(12) |
| <b>Compound 4</b> |            |                  |            |
| Zn(1)–O(5)A       | 1.975(2)   | Zn(1)–O(1)       | 2.011(2)   |
| Zn(1)–O(4)        | 1.978(2)   | Zn(1)–N(1)       | 2.174(3)   |
| Zn(1)–N(2)        | 2.170(3)   | P(1)–O(3)        | 1.512(2)   |
| P(1)–O(1)         | 1.502(2)   | P(1)–C(1)        | 1.832(3)   |
| P(1)–O(2)         | 1.576(2)   | P(2)–O(4)        | 1.517(2)   |
| P(2)–O(5)         | 1.498(2)   | P(2)–C(1)        | 1.845(4)   |
| P(2)–O(6)         | 1.568(2)   | O(5)A–Zn(1)–O(1) | 98.02(9)   |
| O(5)A–Zn(1)–O(4)  | 103.41(10) | O(5)A–Zn(1)–N(2) | 85.50(10)  |
| O(4)–Zn(1)–O(1)   | 96.73(9)   | O(1)–Zn(1)–N(2)  | 158.02(10) |
| O(4)–Zn(1)–N(2)   | 103.58(10) | O(4)–Zn(1)–N(1)  | 116.26(10) |
| O(5)A–Zn(1)–N(1)  | 138.92(10) | N(2)–Zn(1)–N(1)  | 75.63(10)  |
| O(1)–Zn(1)–N(1)   | 87.97(9)   |                  |            |

Symmetry transformations used to generate equivalent atoms for **1**: A  $-x, -y+2, -z$ ; for **2**: A  $-x+1, -y, -z$ ; for **3**: A  $-x+3/2, -y, z$ ; B  $x, -y+1/2, -z+1/2$ ; for **4**: A  $-x+1/2, y+1/2, -z+1/2$ .

**Table S2** Hydrogen bonds for compounds **1–4**

| D–H $\cdots$ A       | D(D–H)/ Å | d(H $\cdots$ A)/ Å | D–H–A/ ° | d(D $\cdots$ A)/ Å |
|----------------------|-----------|--------------------|----------|--------------------|
| <b>compound 1</b>    |           |                    |          |                    |
| O3–H3A $\cdots$ O5   | 0.85      | 1.71               | 160      | 2.530(3)           |
| <b>compound 2</b>    |           |                    |          |                    |
| O5–H5D $\cdots$ O4   | 0.85      | 1.93               | 164      | 2.755(3)           |
| O1W–H1WC $\cdots$ O6 | 0.85      | 2.16               | 160      | 2.977(4)           |
| O3–H3A $\cdots$ O1W  | 0.85      | 1.82               | 169      | 2.659(3)           |
| <b>compound 3</b>    |           |                    |          |                    |
| O6–H3A $\cdots$ O4   | 0.85      | 1.87               | 166      | 2.705(3)           |
| <b>compound 4</b>    |           |                    |          |                    |
| O2–H2D $\cdots$ O3   | 0.82      | 1.78               | 175      | 2.603(3)           |
